# Supplementary material
Source: PubMed Central journal article supplement (PMC7471345)
Supplement: ajcr0010-2677-f6.pdf [file ajcr0010-2677-f6.pdf]

## ADAR1 controls ITGB3 via miR-30 family

**Supplementary Table 1.** List of primers used in this study

| PRIMER           | SEQUENCE                                            |
|------------------|-----------------------------------------------------|
| ITGB3 FORWARD    | 5'-ATTACCGGTGCCACCATGCGAGCGCGGCCGCGG-3'             |
| ITGB3 REVERSED   | 5'-GACTTAATTAATTAAGTGCCCCGGTACGTGA-3'               |
| ITGB3-UTR-FWD    | 5'-GCTCTCGAGTAAGCAGTCATCCTCAGATCATTATCA-3'          |
| ITGB3-UTR-REV    | 5'-gtacGCGGCCGCAGGGCCAGGTATGTGGAGGT-3'              |
| UTR-MIR30MUT-FWD | 5'-CAGGAGTCCCTGCCATCATGCTGATAGAGGACAGTATTTGTGGGG-3' |
| UTR-MIR30MUT-REV | 5'-CCCACAAATACTGCCTCTATCAGCATGATGGCAGGGACTCCTG-3'   |
| MIR-30-FWD       | 5'-TGCACTTGGTGAACCACTTTC-3'                         |
| MIR-30-REV       | 5'-GGTTTTCCACACATTTTATAGCC-3'                       |
